# Supplementary material
Source: PubMed Central journal article supplement (PMC4096376)
Supplement: supp_114.165605_165605SI.pdf [file supp_114.165605_165605SI.pdf]

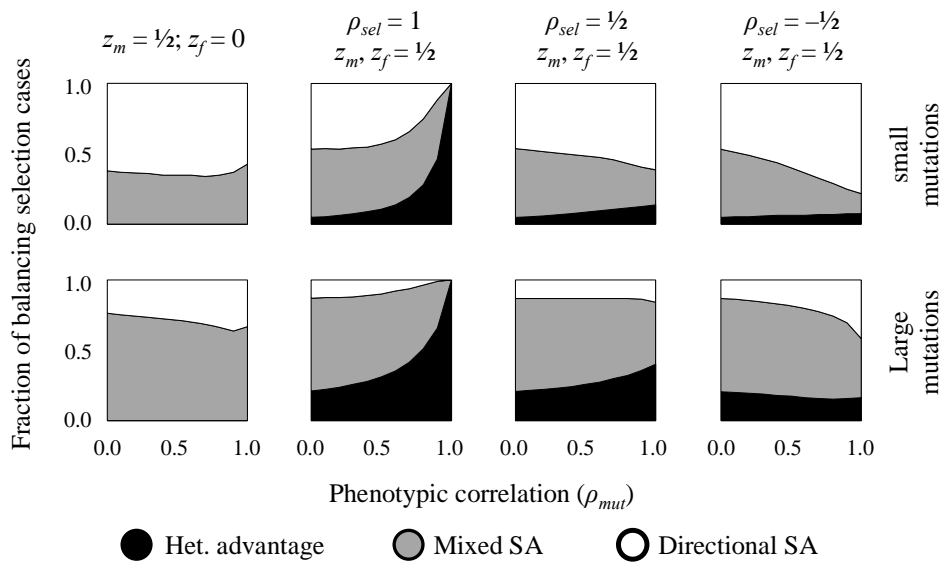

**Figure S1** Mechanisms of balancing selection, and their relative probabilities, for  $n = 5$ , and  $h = 0.25$ . For each parameter set  $(z_m, z_f, \rho_{sel}, \rho_{mut})$ , 100,000 balanced polymorphisms were randomly generated using the simulation approach described in the main text and in the Fig. 4 legend, but with small mutations using  $E[r] = 0.05n^{0.5}$  and large mutations using  $E[r] = 0.4n^{0.5}$  (these values correspond to male-specific scaled sizes of  $E[x_m] = 0.25$ , and  $E[x_m] = 2$ , respectively).

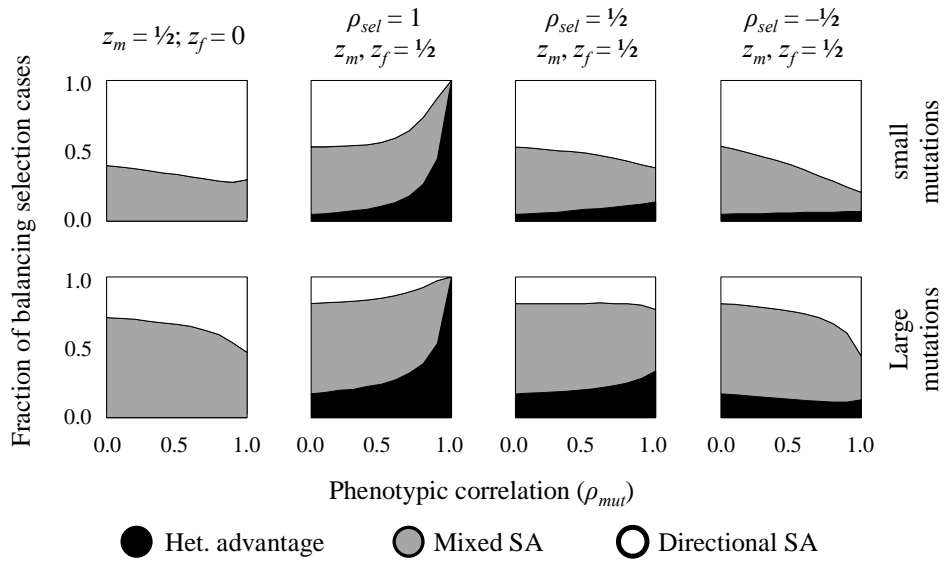

**Figure S2** Mechanisms of balancing selection, and their relative probabilities, for  $n = 5$ , and  $h = 0.5$ . Details otherwise follow those in the Figure S1 legend.

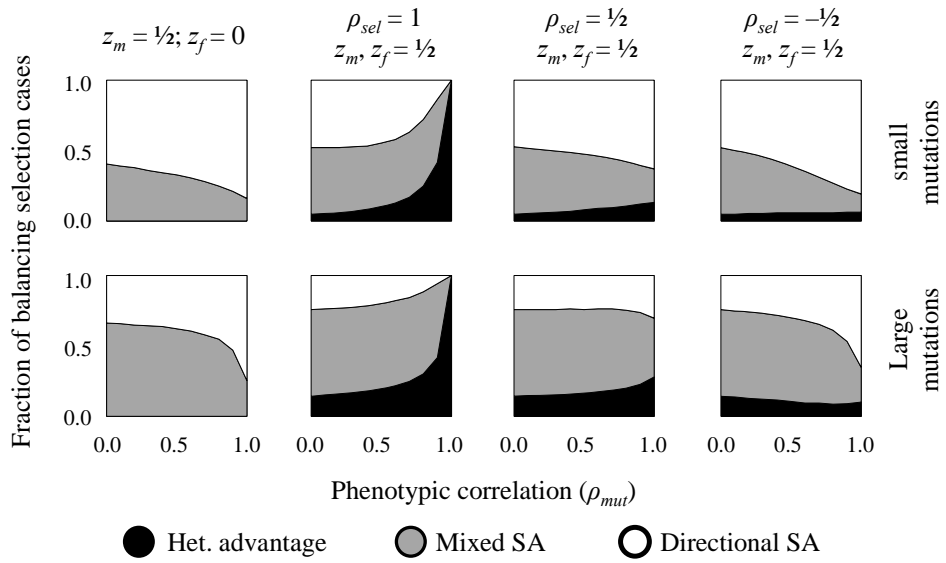

**Figure S3** Mechanisms of balancing selection, and their relative probabilities, for  $n = 5$ , and  $h = 0.75$ . Details otherwise follow those in the Figure S1 legend.

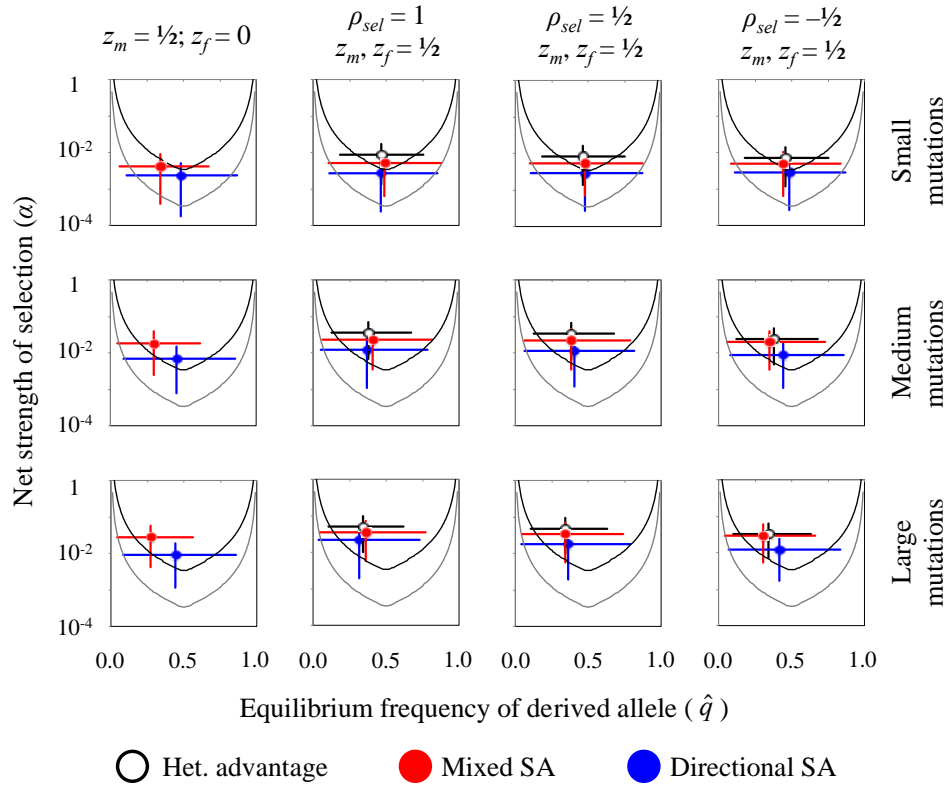

**Figure S4** Efficacy of balancing selection, showing results for  $\rho_{mut} = 0.5$ , and all other details described in Fig. 5 of the main text.

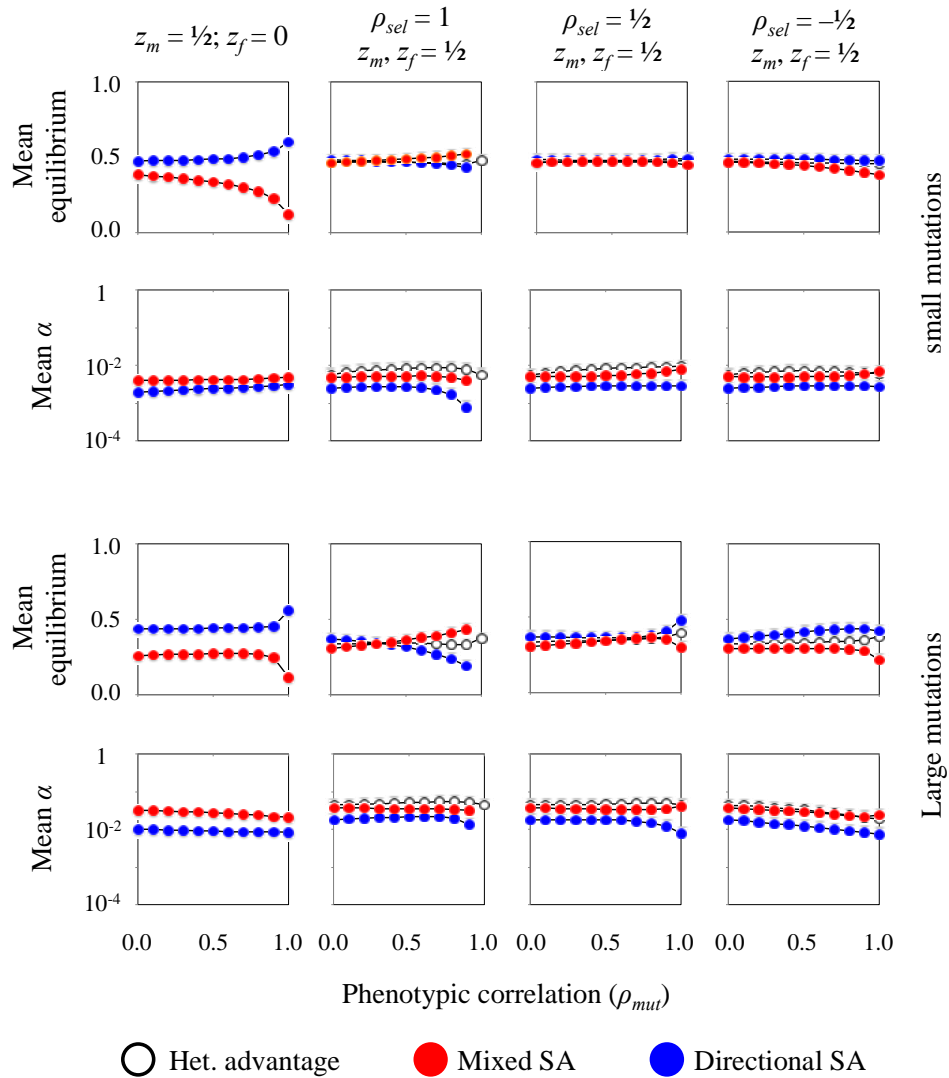

**Figure S5** Mean alpha and  $\hat{q}$ , for  $n = 25$ ,  $h = 0.5$ , and  $\omega_m = \omega_f = 1/2$ . Each datapoint is based on 500,000 randomly simulated balanced polymorphisms for the given parameter set ( $z_m, z_f, \rho_{sel}, \rho_{mut}$ ). For each parameter combination, mutation magnitudes were generated using a bivariate exponential distribution (gamma with shape parameter  $k = 1$ ), with equal marginal distributions, and correlation of  $\rho_{mut} = \text{corr}(r_m, r_f)$ . Small mutations use  $E[r] = 0.05$ , and large mutations use  $E[r] = 0.4$  (corresponding to male-specific scaled sizes of  $E[x_m] = 0.25$ , and  $E[x_m] = 2$ , respectively).

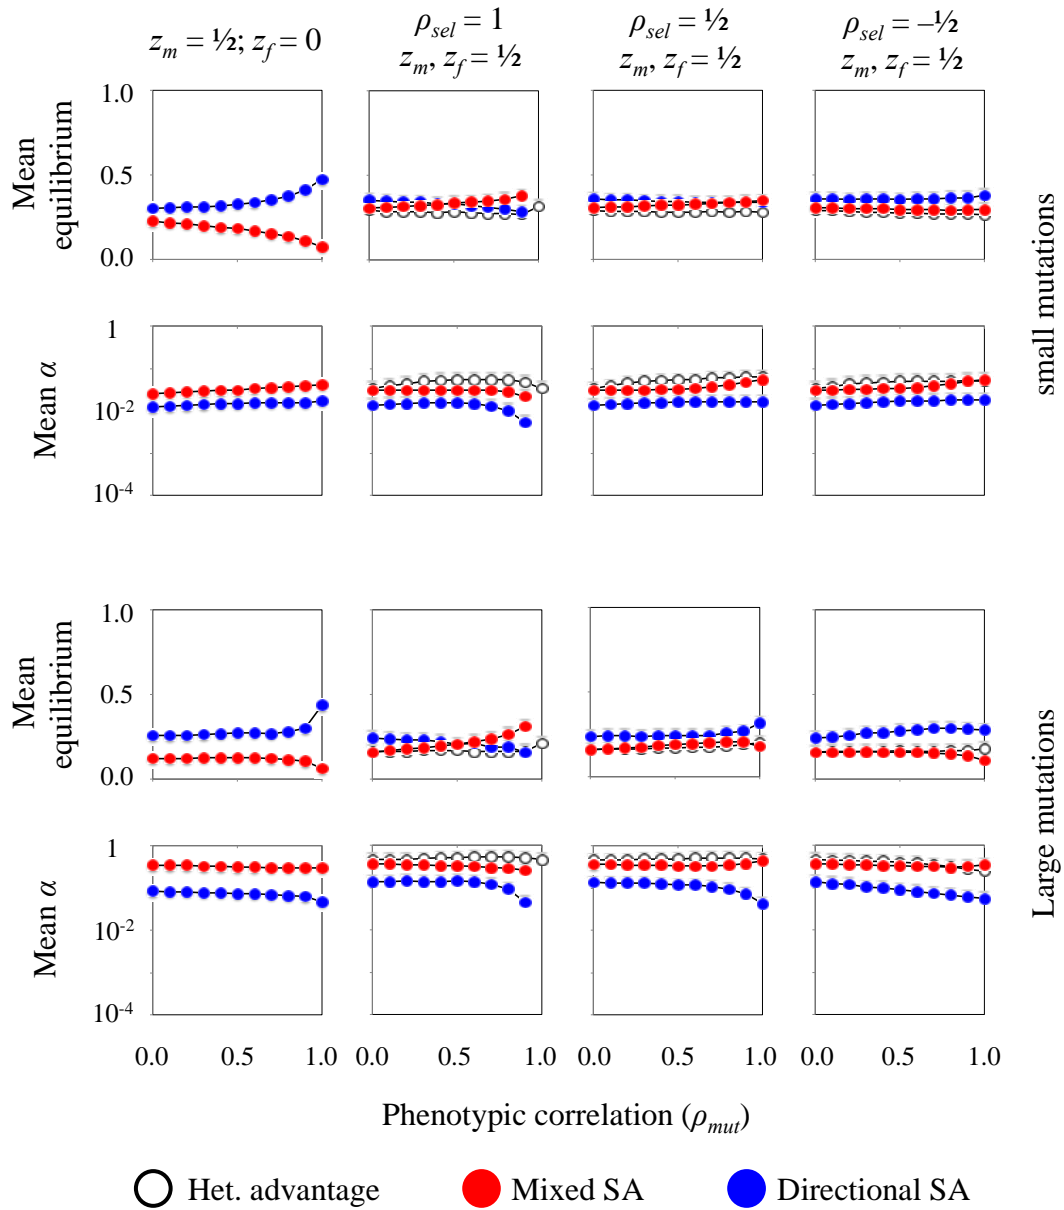

**Figure S6** Mean alpha and  $\hat{q}$ , for  $n = 5$ ,  $h = 0.25$ , and  $\omega_m = \omega_f = 1/2$ . Each datapoint is based on 100,000 randomly simulated balanced polymorphisms for the given parameter set ( $z_m, z_f, \rho_{sel}, \rho_{mut}$ ). For each parameter combination, mutation magnitudes were generated using a bivariate exponential distribution (gamma with shape parameter  $k = 1$ ), with equal marginal distributions, and correlation of  $\rho_{mut} = \text{corr}(r_m, r_f)$ . Small mutations use  $E[r] = 0.05n^{0.5}$ , and large mutations use  $E[r] = 0.4n^{0.5}$  (corresponding to male-specific scaled sizes of  $E[x_m] = 0.25$ , and  $E[x_m] = 2$ , respectively).

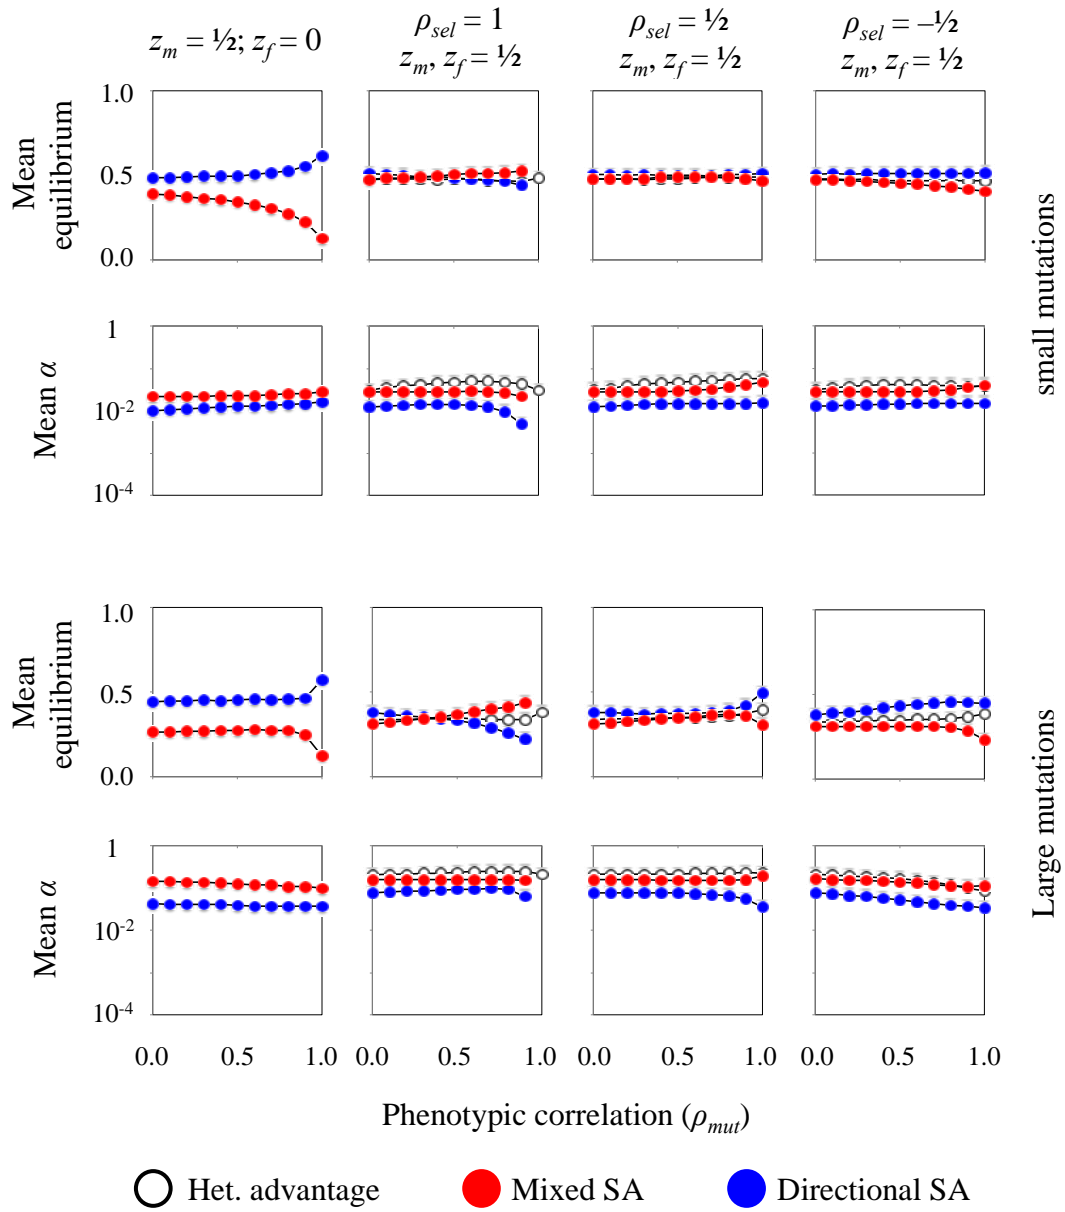

**Figure S7** Mean alpha and  $\hat{q}$ , for  $n = 5$ ,  $h = 0.5$ , and  $\omega_m = \omega_f = 1/2$ . Additional details follow those in the Figure S6 legend.

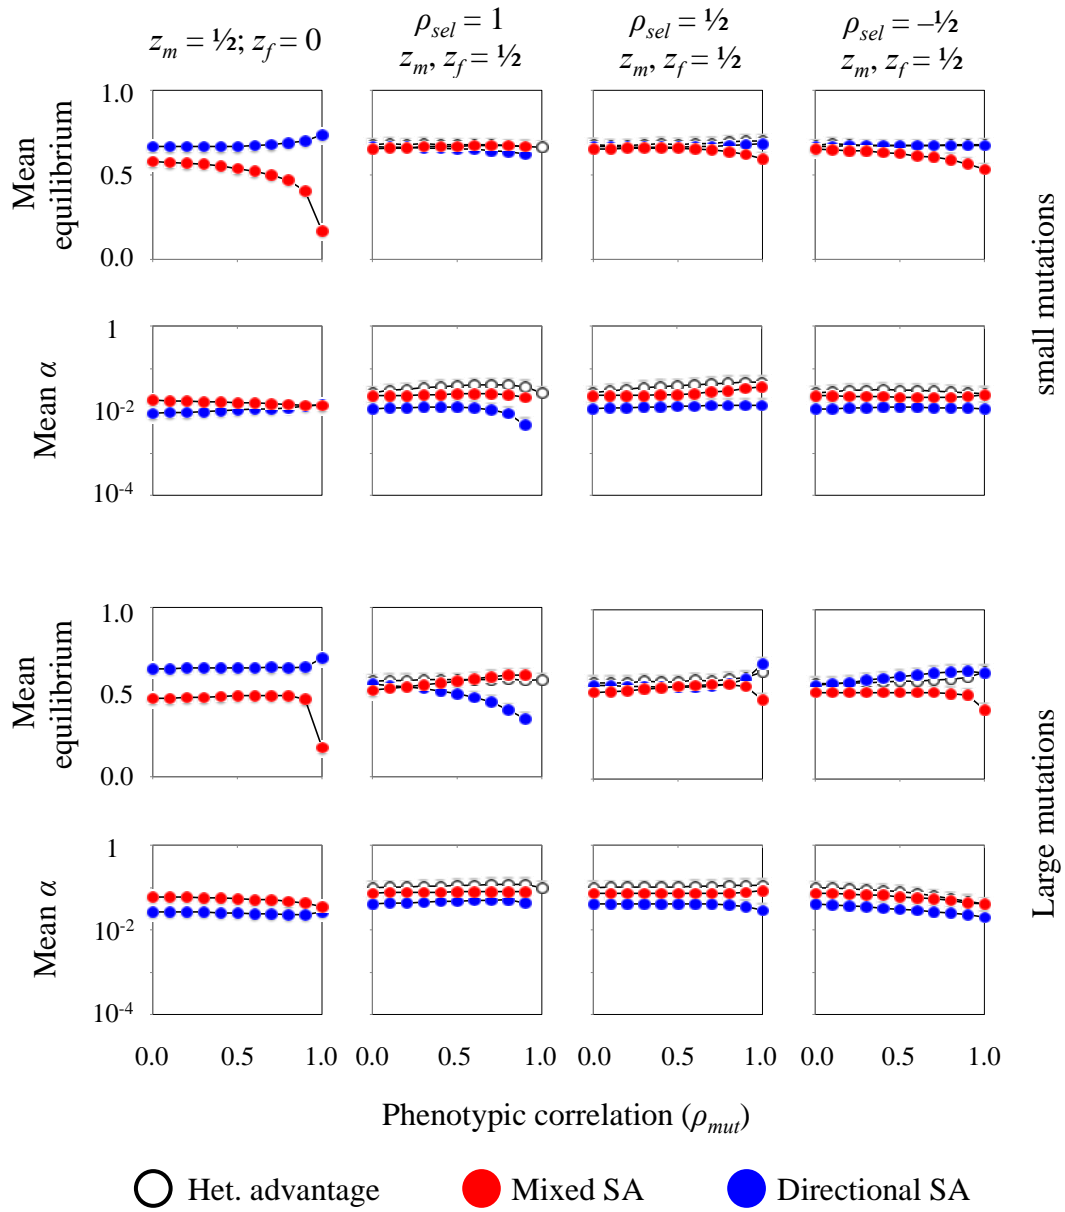

**Figure S8** Mean alpha and  $\hat{q}$ , for  $n = 5$ ,  $h = 0.75$ , and  $\omega_m = \omega_f = 1/2$ . Additional details follow those in the Figure S6 legend.
