# Supplementary material
Source: PubMed Central journal article supplement (PMC4096376)
Supplement: supp_114.165605_FigureS2.pdf [file supp_114.165605_FigureS2.pdf]

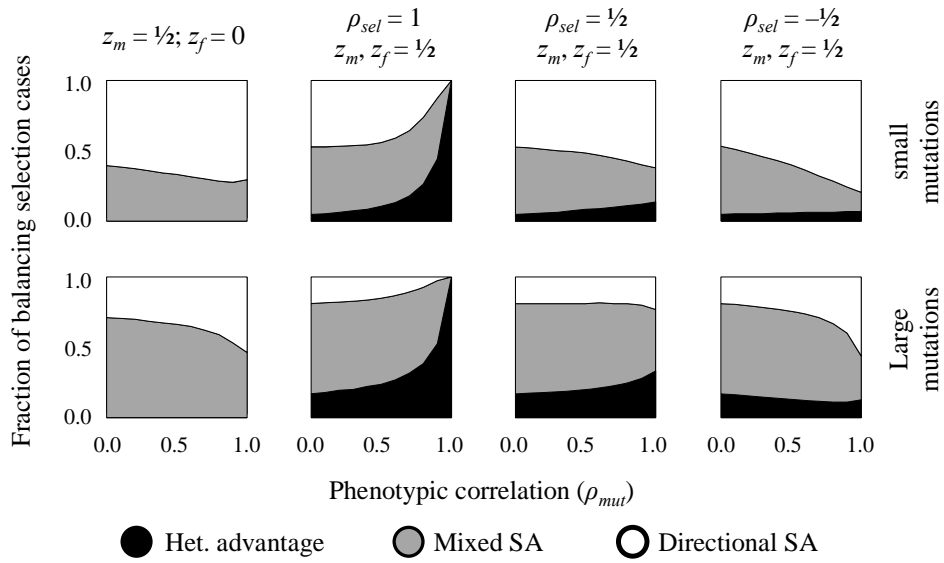

**Figure S2** Mechanisms of balancing selection, and their relative probabilities, for  $n = 5$ , and  $h = 0.5$ . Details otherwise follow those in the Figure S1 legend.
