# Supplementary material
Source: PubMed Central journal article supplement (PMC4096376)
Supplement: supp_114.165605_FigureS3.pdf [file supp_114.165605_FigureS3.pdf]

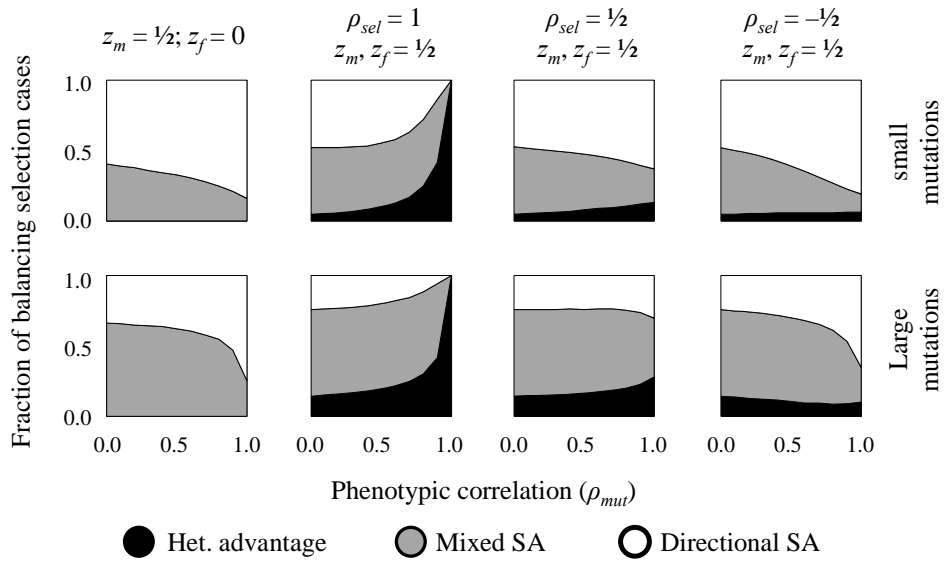

**Figure S3** Mechanisms of balancing selection, and their relative probabilities, for  $n = 5$ , and  $h = 0.75$ . Details otherwise follow those in the Figure S1 legend.
