# Supplementary material
Source: PubMed Central journal article supplement (PMC4096376)
Supplement: supp_114.165605_FigureS4.pdf [file supp_114.165605_FigureS4.pdf]

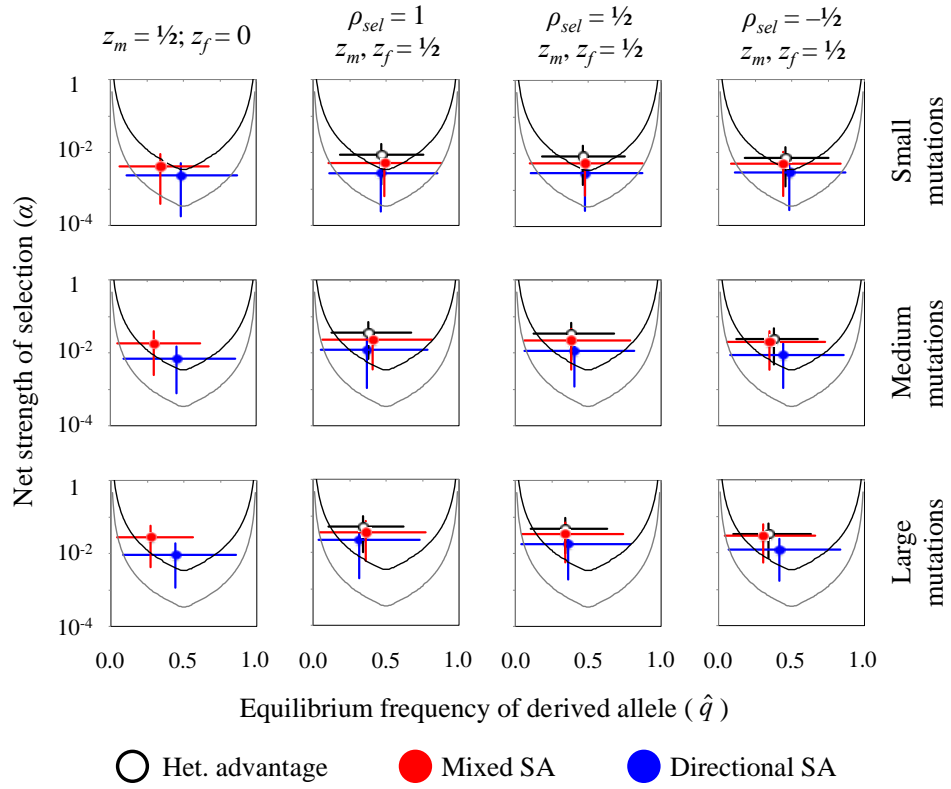

**Figure S4** Efficacy of balancing selection, showing results for  $\rho_{mut} = 0.5$ , and all other details described in Fig. 5 of the main text.
