# Supplementary material
Source: PubMed Central journal article supplement (PMC4096376)
Supplement: supp_114.165605_FigureS5.pdf [file supp_114.165605_FigureS5.pdf]

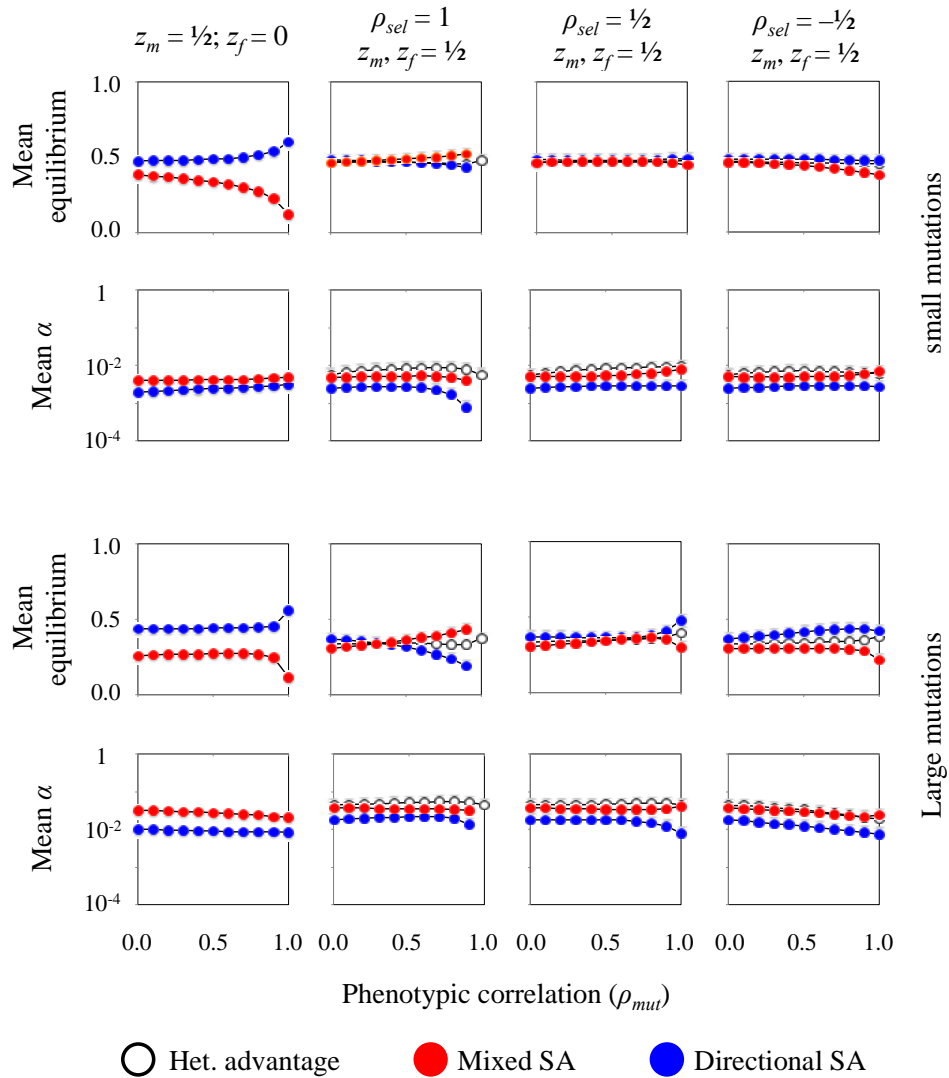

**Figure S5** Mean alpha and  $\hat{q}$ , for  $n = 25$ ,  $h = 0.5$ , and  $\omega_m = \omega_f = 1/2$ . Each datapoint is based on 500,000 randomly simulated balanced polymorphisms for the given parameter set  $(z_m, z_f, \rho_{sel}, \rho_{mut})$ . For each parameter combination, mutation magnitudes were generated using a bivariate exponential distribution (gamma with shape parameter  $k = 1$ ), with equal marginal distributions, and correlation of  $\rho_{mut} = \text{corr}(r_m, r_f)$ . Small mutations use  $E[r] = 0.05$ , and large mutations use  $E[r] = 0.4$  (corresponding to male-specific scaled sizes of  $E[x_m] = 0.25$ , and  $E[x_m] = 2$ , respectively).
