# Supplementary material
Source: PubMed Central journal article supplement (PMC4096376)
Supplement: supp_114.165605_FigureS8.pdf [file supp_114.165605_FigureS8.pdf]

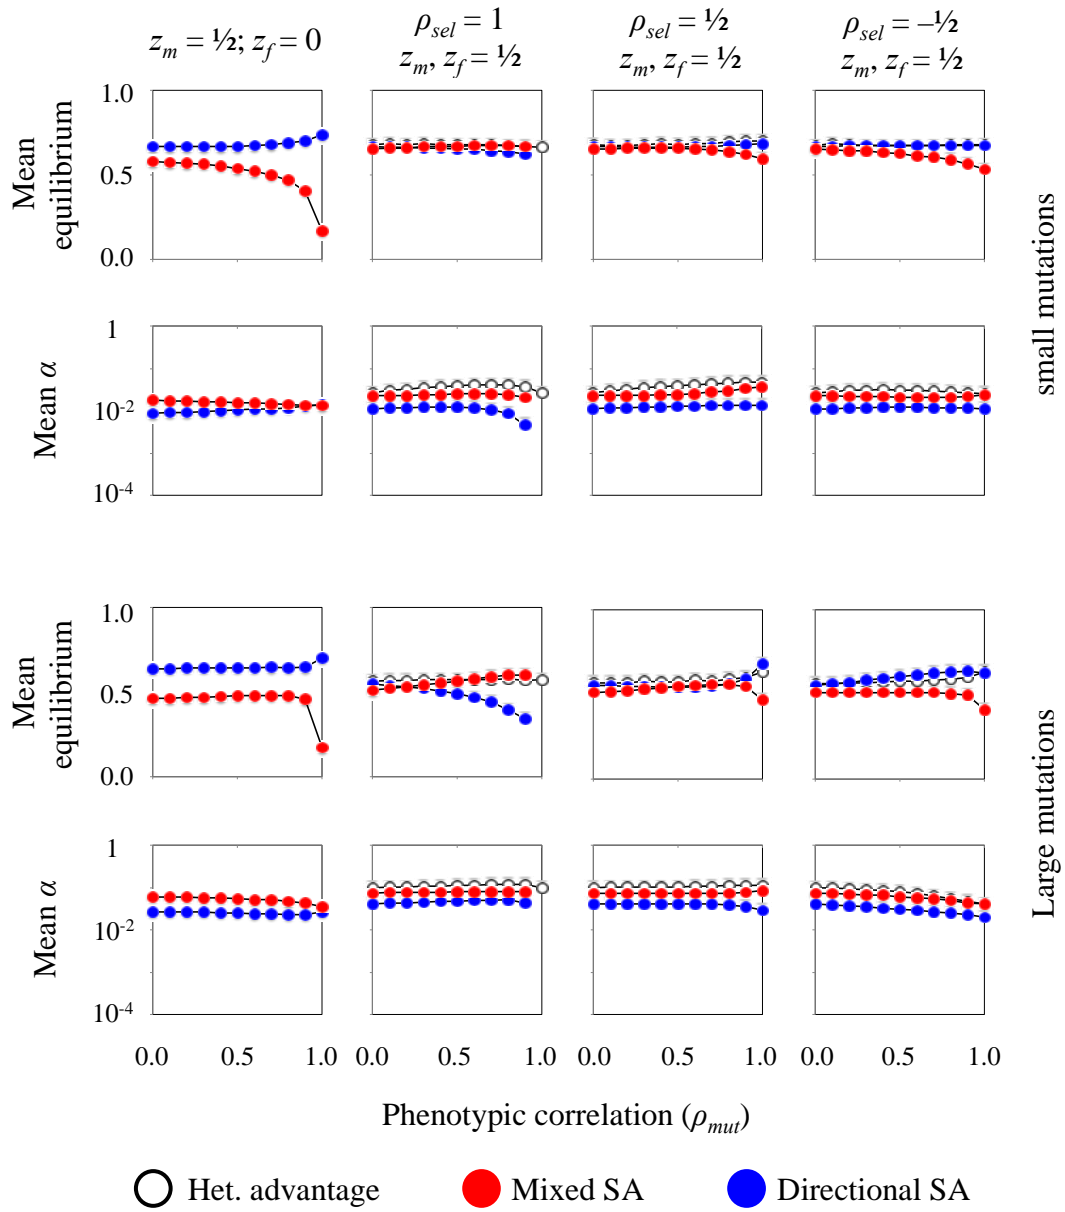

**Figure S8** Mean alpha and  $\hat{q}$ , for  $n = 5$ ,  $h = 0.75$ , and  $\omega_m = \omega_f = 1/2$ . Additional details follow those in the Figure S6 legend.
